# Supplementary material for: Three-dimensional polydimethylsiloxane/barium titanate elastomer networks for piezoelectric energy harvesters
Source: Royal Society of Chemistry journal article supplement (doi:10.1039/d4ta04154b), 2024-01-01
Supplement: d4ta04154b1.pdf [file d4ta04154b1.pdf]

Supporting Information

**Three-dimensional polydimethylsiloxane/barium titanate elastomer networks for piezoelectric energy harvesters**

Yuanbiao Gong<sup>1</sup>, Weijia Wang<sup>1,\*</sup>, Xiuzi Che<sup>1</sup>, Yao Su<sup>1</sup>, Yuxin Jia<sup>2</sup>, Xiaohu Ren<sup>3,\*</sup>, Huiqing Fan<sup>1,\*</sup>

*1 State Key Laboratory of Solidification Processing, School of Materials Science and Engineering, Northwestern Polytechnical University, Xi'an 710072, China*

*2 School of Electronics and Information, Northwestern Polytechnical University, Xi'an 710072, P. R. China*

*3 College of Materials Science and Engineering, Xi'an University of Architecture and Technology, Xi'an 710055, China*

\*E-mail addresses of corresponding authors:

E-mail address: [weijia.wang@nwpu.edu.cn](mailto:weijia.wang@nwpu.edu.cn) (W. Wang).

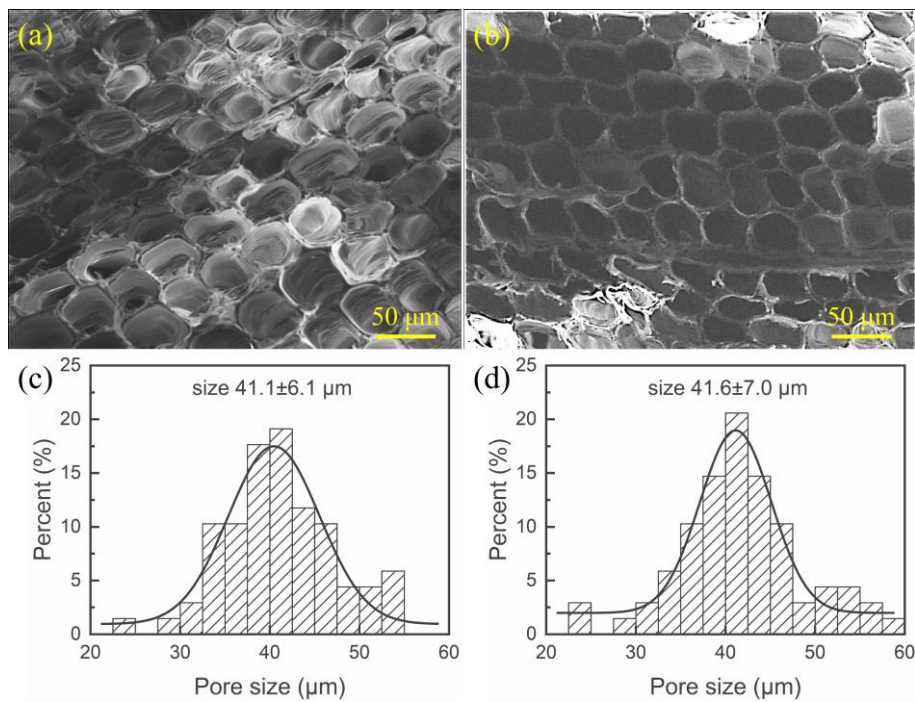

**Fig. S1.** SEM images in the transverse direction of (a) natural pine wood and (b) chemical-treated pine wood, pore size statistics of (c) natural pine wood and (d) natural pine wood.

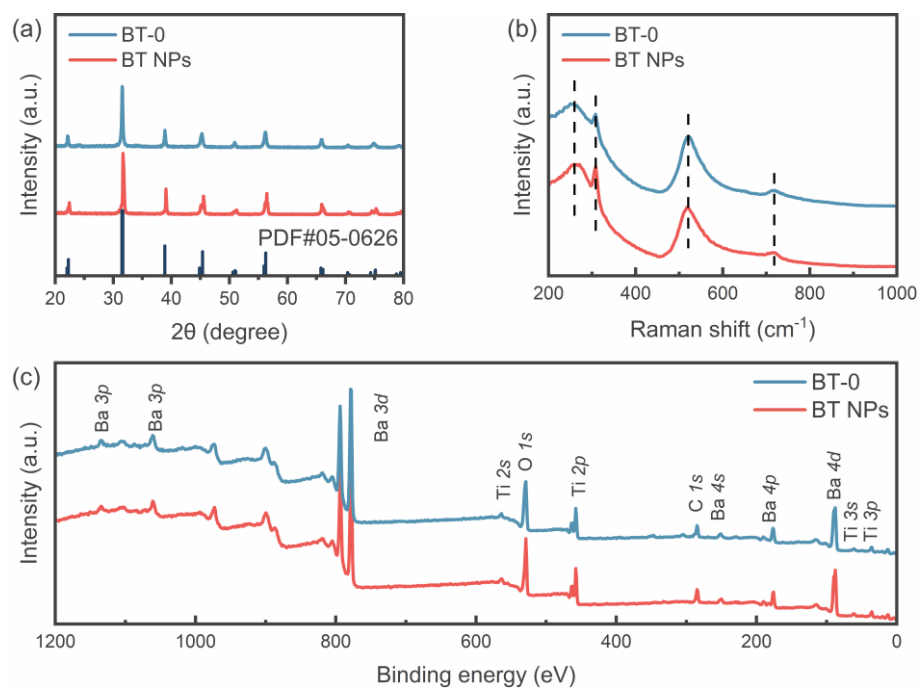

**Fig. S2** (a) XRD patterns, (b) Raman spectra and (c) XPS survey spectra of BT NPs and BT-0.

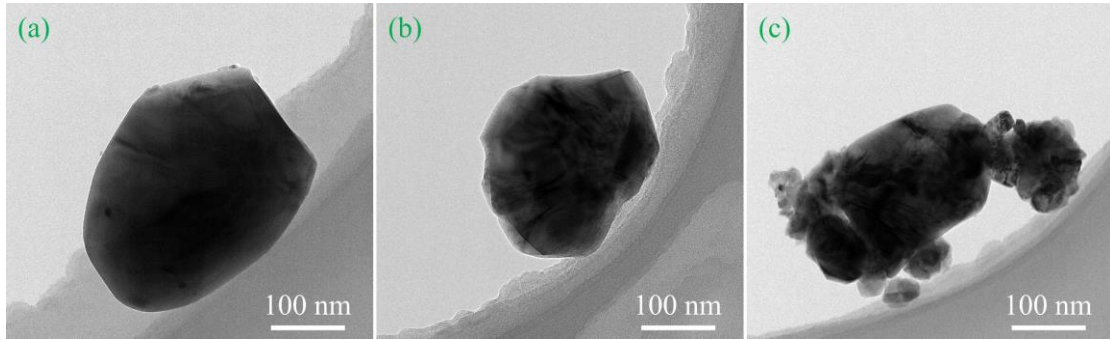

**Fig. S3** TEM images of BT NPs, BT-0 and BT-75.

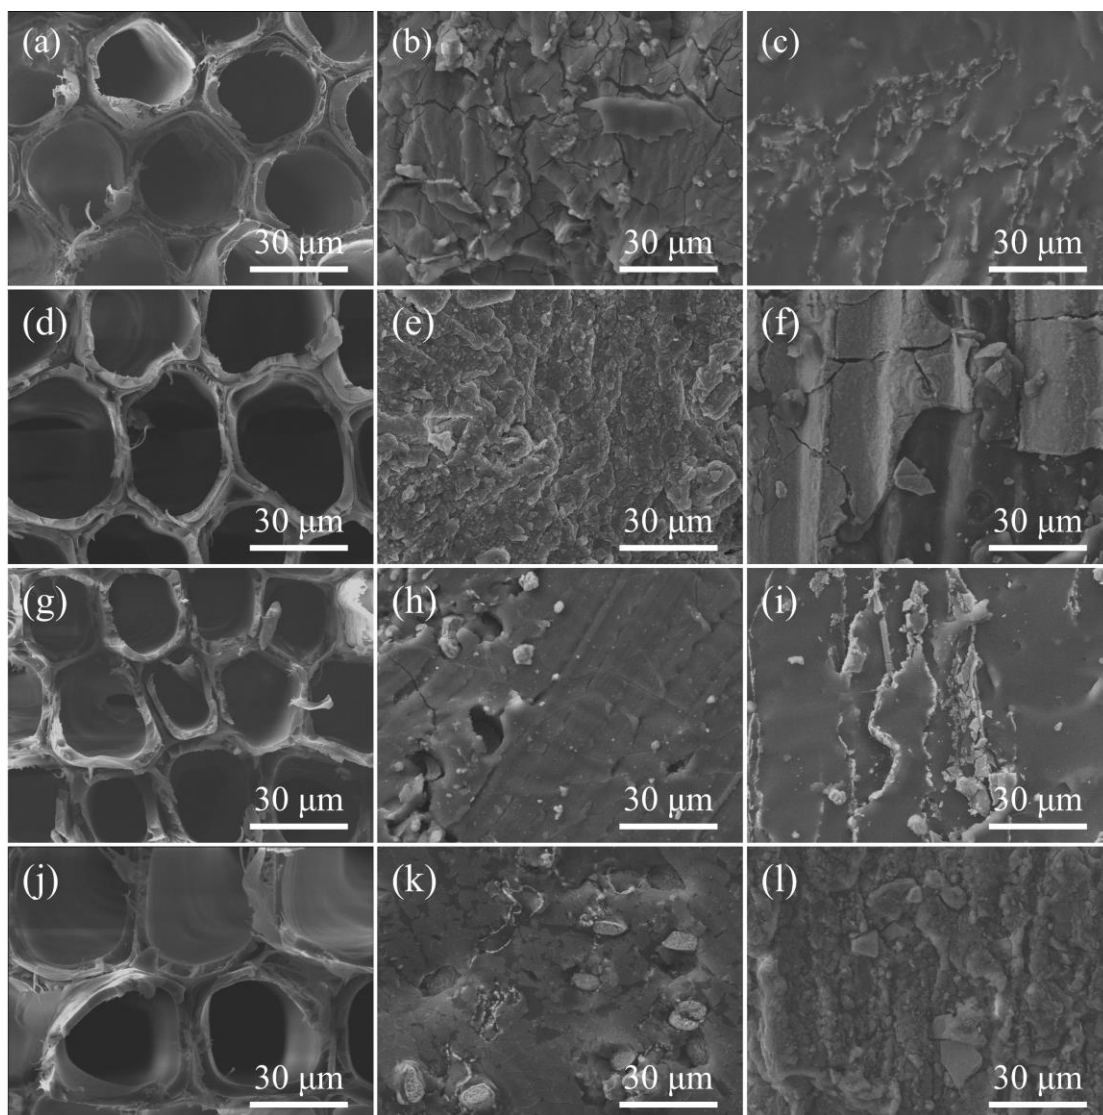

**Fig. S4** SEM images of precursor in the transverse direction, PDMS/BT- $x$  composite in the transverse direction and PDMS/BT- $x$  composite in the longitudinal direction: (a-c)  $x=0$ , (d-f)  $x=25$ , (g-i)  $x=50$ , (j-l)  $x=100$ .

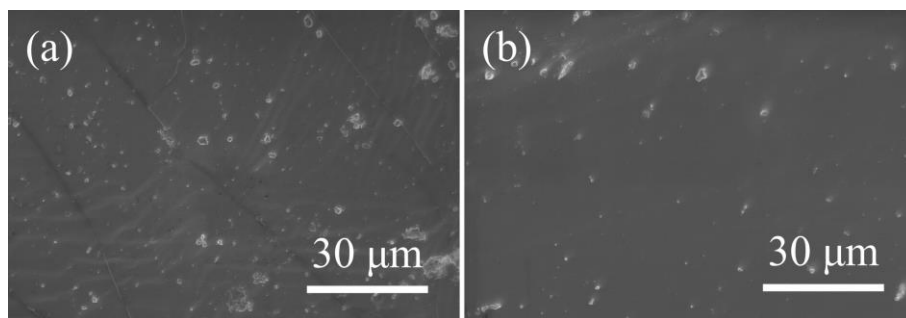

**Fig. S5** Magnified SEM images of R-PDMS/BT-75 in the (a) transverse and (b) longitudinal direction.

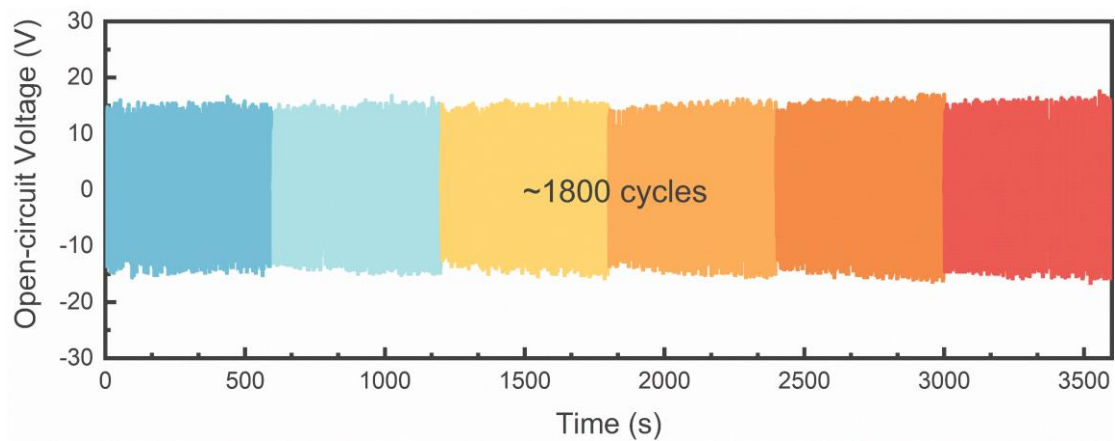

**Fig. S6** The stability and durability test results of PDMS/BT-75 PEH.

**Table S1.** Piezoelectric output performance between this work and other reports constructing PEHs through other methods.

| Materials               | Preparation                    | $V_{oc}$<br>(V) | $I_{sc}$<br>( $\mu$ A) | Power<br>density<br>( $\mu$ W/cm <sup>2</sup> ) | References |
|-------------------------|--------------------------------|-----------------|------------------------|-------------------------------------------------|------------|
| PDMS/Sm-PMN-PT          | freeze-casting                 | 32.5            | 0.65                   | 2.72                                            | 1          |
| PDMS/BT@C               | casting                        | 31              | 1.8                    | 45.4                                            | 2          |
| PVDF-TrFE/BTO/PVDF-TrFE | single-crystal<br>spin-coating | 15.1            | 2.39                   | 17.33                                           | 3          |
| PDMS/BT                 | 3D printing<br>templating      | 18              | \                      | 17                                              | 4          |
| PDMS/PZT                | Templating                     | 85              | 0.04                   | \                                               | 5          |
| PDMS/BCZT               | Freeze casting<br>polymer      | 30.2            | 13.8                   | 96.2                                            | 6          |
| PDMS/BT                 | template<br>electrospinning    | 46              | 14.5                   | 4.89                                            | 7          |
| PDMS/BT                 | Templating                     | 86.6            | 17.3                   | 39.98                                           | This work  |



## References

- 1 H. Xu, Y. Hou, X. Yu, X. Gao, M. Zheng and M. Zhu, *J. Mater. Chem. C*, 2022, **10**, 15035-15043.
- 2 Z. Zhou, X. Du, Z. Zhang, J. Luo, S. Niu, D. Shen, Y. Wang, H. Yang, Q. Zhang and S. Dong, *Nano Energy*, 2021, **82**, 105709.
- 3 R. Peng, B. Zhang, G. Dong, Y. Wang, G. Yang, J. Zhang, B. Peng, Y. Zhao and M. Liu, *Adv. Funct. Mater.*, 2024, DOI: 10.1002/adfm.202316519.
- 4 Z. Wang, J. Cheng, Y. Xie, Y. Wang, Z. Yu, S. Li, L. Li, S. Dong and H. Wang, *Adv. Mater. Technol.*, 2022, **7**, 2200650.
- 5 G. Zhang, P. Zhao, X. Zhang, K. Han, T. Zhao, Y. Zhang, C. K. Jeong, S. Jiang, S. Zhang and Q. Wang, *Energy Environ. Sci.*, 2018, **11**, 2046-2056.
- 6 M. Yan, J. Zhong, S. Liu, Z. Xiao, X. Yuan, D. Zhai, K. Zhou, Z. Li, D. Zhang, C. Bowen and Y. Zhang, *Nano Energy*, 2021, **88**, 106278.
- 7 J. Yan, Y. Qin, M. Li, Y. Zhao, W. Kang and G. Yang, *ACS Appl. Mater. Interfaces*, 2022, **14**, 55039-55050.
